# Supplementary material for: Views and experiences on lockdown as a response to the prevention and control of COVID-19 crisis among residents of Uganda
Source: Research Square preprint supplement (doi:10.21203/rs.3.rs-432060/v1), 2021-04-27
Supplement: Supplementary file 1 [file 09df00c84e4ca1f69571b8cd.docx]

**Interview Guide***The relevance of the Lockdown as a tool for combating Covid19*

**Introduction**
Welcome remarks and thank participants.
Introduce the study and allow them to sign the consent form

Questions

- How old are you?
- What is your marital status?
- What is your level of education?
- How do you earn your living?
- How many are you in your household?
- Are you aware of the lockdown?
- What purpose do you think the lockdown serves?
- Are you in support of the lockdown? Why or why not?
- How much longer do you think the lockdown must be maintained? And why?
- In what ways do you think the lockdown has been useful? Could you give specific examples? Why have these specific elements been useful for you?
- Are there any other things you appreciate about the lockdown?
- Are there any negative elements you have observed resulting from the lockdown? If yes, which ones? Could you give specific examples? And what makes them negative?
- Is there anything else you do not appreciate about the lockdown?

THANK THE PARTICIPANTS!!
